# Supplementary material
Source: publisher figshare collection journal article supplement (https://acs.figshare.com/ndownloader/files/5336254)
Supplement: Supplementary file 1 [file 5336254]

data_vic0502


_audit_creation_method            SHELXL-97

_chemical_name_systematic

;

 ?

;

_chemical_name_common             ?

_chemical_melting_point           ?

_chemical_formula_moiety          'C15 H15 N5 O2'

_chemical_formula_sum             'C15 H15 N5 O2'

_chemical_formula_weight          297.32


loop_

 _atom_type_symbol

 _atom_type_description

 _atom_type_scat_dispersion_real

 _atom_type_scat_dispersion_imag

 _atom_type_scat_source

 'C'  'C'   0.0033   0.0016

 'International Tables Vol C Tables 4.2.6.8 and 6.1.1.4'

 'H'  'H'   0.0000   0.0000

 'International Tables Vol C Tables 4.2.6.8 and 6.1.1.4'

 'N'  'N'   0.0061   0.0033

 'International Tables Vol C Tables 4.2.6.8 and 6.1.1.4'

 'O'  'O'   0.0106   0.0060

 'International Tables Vol C Tables 4.2.6.8 and 6.1.1.4'


_symmetry_cell_setting            Triclinic

_symmetry_space_group_name_H-M    'P -1'

_symmetry_space_group_name_Hall   '-P 1'


loop_

 _symmetry_equiv_pos_as_xyz

 'x, y, z'

 '-x, -y, -z'


_cell_length_a                    7.2118(10)

_cell_length_b                    9.8215(14)

_cell_length_c                    11.7772(16)

_cell_angle_alpha                 110.419(2)

_cell_angle_beta                  96.245(2)

_cell_angle_gamma                 105.752(2)

_cell_volume                      733.01(18)

_cell_formula_units_Z             2

_cell_measurement_temperature     193(2)

_cell_measurement_reflns_used     1562

_cell_measurement_theta_min       2.35

_cell_measurement_theta_max       25.89


_exptl_crystal_description        fragment

_exptl_crystal_colour             orange-red

_exptl_crystal_size_max           0.52

_exptl_crystal_size_mid           0.12

_exptl_crystal_size_min           0.06

_exptl_crystal_density_meas       ?

_exptl_crystal_density_diffrn     1.347

_exptl_crystal_density_method     'not measured'

_exptl_crystal_F_000              312

_exptl_absorpt_coefficient_mu     0.094

_exptl_absorpt_correction_type    integration

_exptl_absorpt_correction_T_min   0.9527

_exptl_absorpt_correction_T_max   0.9944

_exptl_absorpt_process_details    'Bruker SHELXTL (Bruker, 1997)'


_exptl_special_details

;

 ?

;


_diffrn_ambient_temperature       193(2)

_diffrn_radiation_wavelength      0.71073

_diffrn_radiation_type            MoK\a

_diffrn_radiation_source          'fine-focus sealed tube'

_diffrn_radiation_monochromator   graphite

_diffrn_measurement_device_type

 'Bruker PLATFORM diffractometer/SMART 1000 CCD area detector'

_diffrn_measurement_method        '\w scans'

_diffrn_detector_area_resol_mean  8.192

_diffrn_standards_number          0

_diffrn_standards_interval_time   0

_diffrn_standards_decay_%         0

_diffrn_reflns_number             5484

_diffrn_reflns_av_R_equivalents   0.0289

_diffrn_reflns_av_sigmaI/netI     0.0486

_diffrn_reflns_limit_h_min        -9

_diffrn_reflns_limit_h_max        8

_diffrn_reflns_limit_k_min        -12

_diffrn_reflns_limit_k_max        12

_diffrn_reflns_limit_l_min        -14

_diffrn_reflns_limit_l_max        14

_diffrn_reflns_theta_min          1.89

_diffrn_reflns_theta_max          26.38

_reflns_number_total              2972

_reflns_number_gt                 1910

_reflns_threshold_expression      I>2\s(I)


_computing_data_collection        'Bruker SMART (Bruker, 1997)'

_computing_cell_refinement        'Bruker SAINT (Bruker, 1997)'

_computing_data_reduction         'Bruker SAINT (Bruker, 1997)'

_computing_structure_solution     'SHELXS-97 (Sheldrick, 1990)'

_computing_structure_refinement   'SHELXL-97 (Sheldrick, 1997)'

_computing_molecular_graphics     'Bruker SHELXTL (Bruker, 1997)'

_computing_publication_material   'Bruker SHELXTL (Bruker, 1997)'


_refine_special_details

;

 Refinement of F^2^ against ALL reflections.  The weighted R-factor wR and

 goodness of fit S are based on F^2^, conventional R-factors R are based

 on F, with F set to zero for negative F^2^. The threshold expression of

 F^2^ > 2sigma(F^2^) is used only for calculating R-factors(gt) etc. and is

 not relevant to the choice of reflections for refinement.  R-factors based

 on F^2^ are statistically about twice as large as those based on F, and R-

 factors based on ALL data will be even larger.

;


_refine_ls_structure_factor_coef  Fsqd

_refine_ls_matrix_type            full

_refine_ls_weighting_scheme       calc

_refine_ls_weighting_details

 'calc w=1/[\s^2^(Fo^2^)+(0.0715P)^2^+0.0000P] where P=(Fo^2^+2Fc^2^)/3'

_atom_sites_solution_primary      direct

_atom_sites_solution_secondary    difmap

_atom_sites_solution_hydrogens    geom

_refine_ls_hydrogen_treatment     constr

_refine_ls_extinction_method      none

_refine_ls_extinction_coef        ?

_refine_ls_number_reflns          2972

_refine_ls_number_parameters      201

_refine_ls_number_restraints      0

_refine_ls_R_factor_all           0.0835

_refine_ls_R_factor_gt            0.0474

_refine_ls_wR_factor_ref          0.1370

_refine_ls_wR_factor_gt           0.1205

_refine_ls_goodness_of_fit_ref    1.013

_refine_ls_restrained_S_all       1.013

_refine_ls_shift/su_max           0.000

_refine_ls_shift/su_mean          0.000


loop_

 _atom_site_label

 _atom_site_type_symbol

 _atom_site_fract_x

 _atom_site_fract_y

 _atom_site_fract_z

 _atom_site_U_iso_or_equiv

 _atom_site_adp_type

 _atom_site_occupancy

 _atom_site_symmetry_multiplicity

 _atom_site_calc_flag

 _atom_site_refinement_flags

 _atom_site_disorder_assembly

 _atom_site_disorder_group

O1 O 0.5527(2) 0.83659(16) 0.39211(14) 0.0541(4) Uani 1 1 d . . .

O2 O 0.5843(2) 0.85695(16) 0.58224(14) 0.0533(4) Uani 1 1 d . . .

N1 N 0.4022(2) 0.53722(18) 0.31300(15) 0.0361(4) Uani 1 1 d . . .

N2 N 0.3212(2) 0.38812(17) 0.27329(14) 0.0368(4) Uani 1 1 d . . .

H2N H 0.2693 0.3477 0.3233 0.044 Uiso 1 1 calc R . .

N3 N 0.3247(2) 0.58752(17) 0.51958(14) 0.0335(4) Uani 1 1 d . . .

N4 N 0.2316(2) 0.44365(17) 0.48975(14) 0.0340(4) Uani 1 1 d . . .

N5 N 0.5193(2) 0.78300(18) 0.46970(16) 0.0384(4) Uani 1 1 d . . .

C1 C 0.4031(3) 0.6203(2) 0.42868(17) 0.0329(4) Uani 1 1 d . . .

C11 C 0.3157(3) 0.2916(2) 0.15187(17) 0.0352(4) Uani 1 1 d . . .

C12 C 0.2675(4) 0.1362(2) 0.1242(2) 0.0525(6) Uani 1 1 d . . .

H12 H 0.2427 0.0985 0.1871 0.063 Uiso 1 1 calc R . .

C13 C 0.2550(4) 0.0350(2) 0.00564(19) 0.0573(7) Uani 1 1 d . . .

H13 H 0.2227 -0.0717 -0.0118 0.069 Uiso 1 1 calc R . .

C14 C 0.2887(3) 0.0859(2) -0.08876(18) 0.0428(5) Uani 1 1 d . . .

C15 C 0.3392(3) 0.2421(2) -0.05904(19) 0.0450(5) Uani 1 1 d . . .

H15 H 0.3646 0.2798 -0.1219 0.054 Uiso 1 1 calc R . .

C16 C 0.3541(3) 0.3460(2) 0.05996(19) 0.0437(5) Uani 1 1 d . . .

H16 H 0.3901 0.4531 0.0782 0.052 Uiso 1 1 calc R . .

C17 C 0.2684(4) -0.0257(3) -0.2184(2) 0.0612(7) Uani 1 1 d . . .

H17A H 0.1496 -0.1156 -0.2410 0.073 Uiso 1 1 calc R . .

H17B H 0.3850 -0.0588 -0.2224 0.073 Uiso 1 1 calc R . .

H17C H 0.2575 0.0243 -0.2766 0.073 Uiso 1 1 calc R . .

C21 C 0.1427(2) 0.4085(2) 0.58168(17) 0.0323(4) Uani 1 1 d . . .

C22 C 0.0349(3) 0.2542(2) 0.54985(18) 0.0375(5) Uani 1 1 d . . .

H22 H 0.0253 0.1797 0.4701 0.045 Uiso 1 1 calc R . .

C23 C -0.0576(3) 0.2094(2) 0.63323(19) 0.0402(5) Uani 1 1 d . . .

H23 H -0.1312 0.1039 0.6100 0.048 Uiso 1 1 calc R . .

C24 C -0.0454(3) 0.3155(2) 0.75081(19) 0.0393(5) Uani 1 1 d . . .

C25 C 0.0652(3) 0.4692(2) 0.78141(19) 0.0421(5) Uani 1 1 d . . .

H25 H 0.0765 0.5435 0.8617 0.051 Uiso 1 1 calc R . .

C26 C 0.1582(3) 0.5163(2) 0.69936(18) 0.0390(5) Uani 1 1 d . . .

H26 H 0.2325 0.6217 0.7227 0.047 Uiso 1 1 calc R . .

C27 C -0.1498(3) 0.2655(3) 0.8404(2) 0.0542(6) Uani 1 1 d . . .

H27A H -0.2646 0.1726 0.7939 0.065 Uiso 1 1 calc R . .

H27B H -0.1939 0.3479 0.8915 0.065 Uiso 1 1 calc R . .

H27C H -0.0591 0.2433 0.8942 0.065 Uiso 1 1 calc R . .


loop_

 _atom_site_aniso_label

 _atom_site_aniso_U_11

 _atom_site_aniso_U_22

 _atom_site_aniso_U_33

 _atom_site_aniso_U_23

 _atom_site_aniso_U_13

 _atom_site_aniso_U_12

O1 0.0665(10) 0.0472(9) 0.0558(10) 0.0329(8) 0.0158(8) 0.0127(7)

O2 0.0697(11) 0.0357(8) 0.0438(9) 0.0112(7) 0.0144(8) 0.0063(7)

N1 0.0354(9) 0.0367(9) 0.0394(10) 0.0172(8) 0.0059(7) 0.0150(7)

N2 0.0419(10) 0.0355(9) 0.0328(9) 0.0141(7) 0.0094(7) 0.0115(7)

N3 0.0330(8) 0.0318(9) 0.0395(9) 0.0170(7) 0.0077(7) 0.0132(7)

N4 0.0347(9) 0.0312(9) 0.0355(9) 0.0134(7) 0.0061(7) 0.0107(7)

N5 0.0432(10) 0.0353(9) 0.0421(11) 0.0187(8) 0.0125(8) 0.0157(7)

C1 0.0332(10) 0.0337(10) 0.0346(11) 0.0154(9) 0.0063(8) 0.0133(8)

C11 0.0351(11) 0.0370(11) 0.0321(11) 0.0128(9) 0.0070(8) 0.0116(8)

C12 0.0793(16) 0.0421(12) 0.0392(12) 0.0212(10) 0.0194(11) 0.0157(11)

C13 0.0933(19) 0.0334(12) 0.0438(13) 0.0163(10) 0.0218(13) 0.0151(12)

C14 0.0467(12) 0.0423(12) 0.0344(11) 0.0128(9) 0.0109(9) 0.0098(9)

C15 0.0531(13) 0.0466(12) 0.0384(12) 0.0222(10) 0.0133(10) 0.0129(10)

C16 0.0547(13) 0.0353(11) 0.0411(12) 0.0171(10) 0.0110(10) 0.0122(10)

C17 0.0836(18) 0.0513(14) 0.0405(13) 0.0145(11) 0.0201(12) 0.0124(12)

C21 0.0295(10) 0.0340(10) 0.0353(11) 0.0140(9) 0.0082(8) 0.0127(8)

C22 0.0384(11) 0.0338(10) 0.0355(11) 0.0099(9) 0.0070(9) 0.0100(8)

C23 0.0379(11) 0.0321(10) 0.0483(12) 0.0171(9) 0.0086(9) 0.0066(8)

C24 0.0323(10) 0.0475(12) 0.0430(12) 0.0227(10) 0.0101(9) 0.0136(9)

C25 0.0458(12) 0.0406(12) 0.0351(11) 0.0092(9) 0.0110(9) 0.0140(9)

C26 0.0417(11) 0.0289(10) 0.0429(12) 0.0108(9) 0.0101(9) 0.0107(8)

C27 0.0537(14) 0.0641(15) 0.0524(14) 0.0305(12) 0.0197(11) 0.0182(11)


_geom_special_details

;

 All esds (except the esd in the dihedral angle between two l.s. planes)

 are estimated using the full covariance matrix.  The cell esds are taken

 into account individually in the estimation of esds in distances, angles

 and torsion angles; correlations between esds in cell parameters are only

 used when they are defined by crystal symmetry.  An approximate (isotropic)

 treatment of cell esds is used for estimating esds involving l.s. planes.

;


loop_

 _geom_bond_atom_site_label_1

 _geom_bond_atom_site_label_2

 _geom_bond_distance

 _geom_bond_site_symmetry_2

 _geom_bond_publ_flag

O1 N5 1.2185(19) . ?

O2 N5 1.230(2) . ?

N1 N2 1.305(2) . ?

N1 C1 1.320(2) . ?

N2 C11 1.402(2) . ?

N3 N4 1.2877(19) . ?

N3 C1 1.357(2) . ?

N4 C21 1.412(2) . ?

N5 C1 1.462(2) . ?

C11 C12 1.377(3) . ?

C11 C16 1.386(3) . ?

C12 C13 1.378(3) . ?

C13 C14 1.387(3) . ?

C14 C15 1.380(3) . ?

C14 C17 1.501(3) . ?

C15 C16 1.388(3) . ?

C21 C26 1.390(2) . ?

C21 C22 1.393(2) . ?

C22 C23 1.374(3) . ?

C23 C24 1.389(3) . ?

C24 C25 1.396(3) . ?

C24 C27 1.501(3) . ?

C25 C26 1.372(3) . ?


loop_

 _geom_angle_atom_site_label_1

 _geom_angle_atom_site_label_2

 _geom_angle_atom_site_label_3

 _geom_angle

 _geom_angle_site_symmetry_1

 _geom_angle_site_symmetry_3

 _geom_angle_publ_flag

N2 N1 C1 117.19(15) . . ?

N1 N2 C11 120.75(15) . . ?

N4 N3 C1 114.59(15) . . ?

N3 N4 C21 115.24(15) . . ?

O1 N5 O2 123.66(16) . . ?

O1 N5 C1 119.20(16) . . ?

O2 N5 C1 117.08(15) . . ?

N1 C1 N3 134.25(17) . . ?

N1 C1 N5 113.11(16) . . ?

N3 C1 N5 112.61(15) . . ?

C12 C11 C16 119.48(18) . . ?

C12 C11 N2 117.65(17) . . ?

C16 C11 N2 122.86(17) . . ?

C11 C12 C13 120.37(19) . . ?

C12 C13 C14 121.36(19) . . ?

C15 C14 C13 117.51(18) . . ?

C15 C14 C17 121.55(19) . . ?

C13 C14 C17 120.94(19) . . ?

C14 C15 C16 122.00(19) . . ?

C11 C16 C15 119.27(18) . . ?

C26 C21 C22 119.33(17) . . ?

C26 C21 N4 124.36(16) . . ?

C22 C21 N4 116.31(16) . . ?

C23 C22 C21 120.38(18) . . ?

C22 C23 C24 121.18(18) . . ?

C23 C24 C25 117.56(18) . . ?

C23 C24 C27 120.69(19) . . ?

C25 C24 C27 121.75(19) . . ?

C26 C25 C24 122.14(19) . . ?

C25 C26 C21 119.42(17) . . ?


loop_

 _geom_torsion_atom_site_label_1

 _geom_torsion_atom_site_label_2

 _geom_torsion_atom_site_label_3

 _geom_torsion_atom_site_label_4

 _geom_torsion

 _geom_torsion_site_symmetry_1

 _geom_torsion_site_symmetry_2

 _geom_torsion_site_symmetry_3

 _geom_torsion_site_symmetry_4

 _geom_torsion_publ_flag

C1 N1 N2 C11 -179.45(16) . . . . ?

C1 N3 N4 C21 -177.69(15) . . . . ?

N2 N1 C1 N3 -5.3(3) . . . . ?

N2 N1 C1 N5 172.41(14) . . . . ?

N4 N3 C1 N1 1.9(3) . . . . ?

N4 N3 C1 N5 -175.82(14) . . . . ?

O1 N5 C1 N1 21.4(2) . . . . ?

O2 N5 C1 N1 -155.96(16) . . . . ?

O1 N5 C1 N3 -160.32(16) . . . . ?

O2 N5 C1 N3 22.3(2) . . . . ?

N1 N2 C11 C12 166.44(17) . . . . ?

N1 N2 C11 C16 -14.4(3) . . . . ?

C16 C11 C12 C13 -0.8(3) . . . . ?

N2 C11 C12 C13 178.4(2) . . . . ?

C11 C12 C13 C14 -0.5(4) . . . . ?

C12 C13 C14 C15 1.3(3) . . . . ?

C12 C13 C14 C17 -178.0(2) . . . . ?

C13 C14 C15 C16 -0.8(3) . . . . ?

C17 C14 C15 C16 178.5(2) . . . . ?

C12 C11 C16 C15 1.3(3) . . . . ?

N2 C11 C16 C15 -177.89(18) . . . . ?

C14 C15 C16 C11 -0.5(3) . . . . ?

N3 N4 C21 C26 -2.9(3) . . . . ?

N3 N4 C21 C22 177.69(15) . . . . ?

C26 C21 C22 C23 0.9(3) . . . . ?

N4 C21 C22 C23 -179.65(17) . . . . ?

C21 C22 C23 C24 -0.4(3) . . . . ?

C22 C23 C24 C25 -0.4(3) . . . . ?

C22 C23 C24 C27 179.02(18) . . . . ?

C23 C24 C25 C26 0.6(3) . . . . ?

C27 C24 C25 C26 -178.82(19) . . . . ?

C24 C25 C26 C21 0.0(3) . . . . ?

C22 C21 C26 C25 -0.7(3) . . . . ?

N4 C21 C26 C25 179.89(18) . . . . ?


loop_

 _geom_hbond_atom_site_label_D

 _geom_hbond_atom_site_label_H

 _geom_hbond_atom_site_label_A

 _geom_hbond_distance_DH

 _geom_hbond_distance_HA

 _geom_hbond_distance_DA

 _geom_hbond_angle_DHA

 _geom_hbond_site_symmetry_A

N2 H2N N4  0.88 1.94 2.606(2) 131.1 .


_diffrn_measured_fraction_theta_max    0.992

_diffrn_reflns_theta_full              26.38

_diffrn_measured_fraction_theta_full   0.992

_refine_diff_density_max    0.234

_refine_diff_density_min   -0.181

_refine_diff_density_rms    0.041
